# Supplementary material for: Functionalization of polyacrylamide for nanotrapping positively charged biomolecules
Source: Royal Society of Chemistry journal article supplement (doi:10.1039/c8ra07764a), 2019-01-01
Supplement: c8ra07764a1.pdf [file c8ra07764a1.pdf]

## Supplementary Information

# Functionalization of polyacrylamide for nanotrapping positively charged biomolecules

Nadejda Davydova,<sup>1,‡</sup> Xavier R. Rodriguez,<sup>2,3,4,‡</sup> Carlos Blázquez,<sup>2,3</sup> Andrés Gómez,<sup>5,\*</sup> Igor Perevyazko,<sup>6</sup> Judith Guasch,<sup>2,3,4,\*</sup> Vladimir Sergeev,<sup>1</sup> Elena Laukhina,<sup>2,3,\*</sup> Imma Ratera,<sup>2,3</sup> and Jaume Veciana<sup>2,3</sup>

<sup>1</sup> A. N. Nesmeyanov Institute of Organoelement Compounds of Russian Academy of Sciences, Vavilova St. 28, 119991 Moscow, Russia

<sup>2</sup> CIBER de Bioingeniería, Biomateriales y Nanomedicina (CIBER-BBN), Spain

<sup>3</sup> Department of Molecular Nanoscience and Organic Materials, Institute of Materials Science of Barcelona (ICMAB-CSIC), Campus UAB, 08193 Barcelona, Spain

<sup>4</sup> Dynamic Biomimetics for Cancer Immunotherapy, Max Planck Partner Group, ICMAB-CSIC, Campus UAB, 08193 Barcelona, Spain

<sup>5</sup> SPM Service, ICMAB-CSIC, Campus UAB, 08193 Barcelona, Spain

<sup>6</sup> Department of Molecular Biophysics and Polymer Physics, St. Petersburg State University, Ulyanovskaya St. 1, 198504 St. Petersburg, Russia

## 1. Partial Specific Volume

The density measurements were carried out in the density meter DMA 5000M (Anton Paar, Graz, Austria) according to the procedure of Kratky et al.[1]

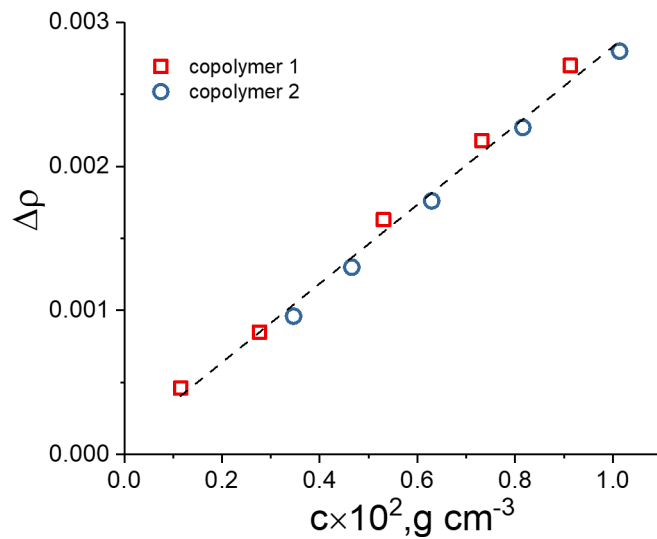

**Figure S1.** Partial specific volume determination for copolymers **1** and **2** in water 0.2 M NaCl solutions,  $T = 25^\circ\text{C}$ .

## 2. Dissociation constants (pKa) of functional units

**Table S1.** Dissociation constants (pKa) of functional units.

| Name                                  | Functional (side) group                                                             | pKa exp. | References |
|---------------------------------------|-------------------------------------------------------------------------------------|----------|------------|
| Arginine                              | 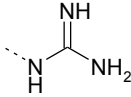   | 12.5     | [2]        |
| Aspartic acid                         | -COOH                                                                               | 3.9      | [2]        |
| Cysteine                              | -SH                                                                                 | 8.3      | [2]        |
| Glutamic acid                         | -COOH                                                                               | 4.2±0.9  | [2]        |
| Histidine                             |    | 6.6±1.0  | [2]        |
| Lysine                                | -NH <sub>2</sub>                                                                    | 10.5±1.1 | [2]        |
| Tyrosine                              |  | 10.3±1.2 | [2]        |
| Propionic acid                        | -COOH                                                                               | 4.8±0.1  | [3]        |
| 4-Methylpyridine                      |  | 6.0      | [4]        |
| Terminal carboxy group in the peptide | -COOH                                                                               | 3.3±0.8  | [5]        |
| Terminal amino group in the peptide   | -NH <sub>2</sub>                                                                    | 7.7±0.5  | [5]        |

### 3. Piezoresistive support

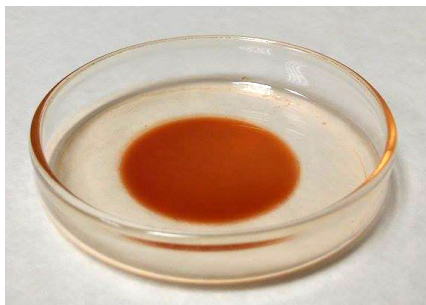

**Figure S2.** Picture of a flexible highly piezo resistive bilayer film-based support consisting of polycarbonate/*001* oriented polycrystalline layer of  $\alpha$ -(BEDT-TTF)<sub>2</sub>I<sub>3</sub>. [6] The conducting layer is self-assembled at the central part of the film.

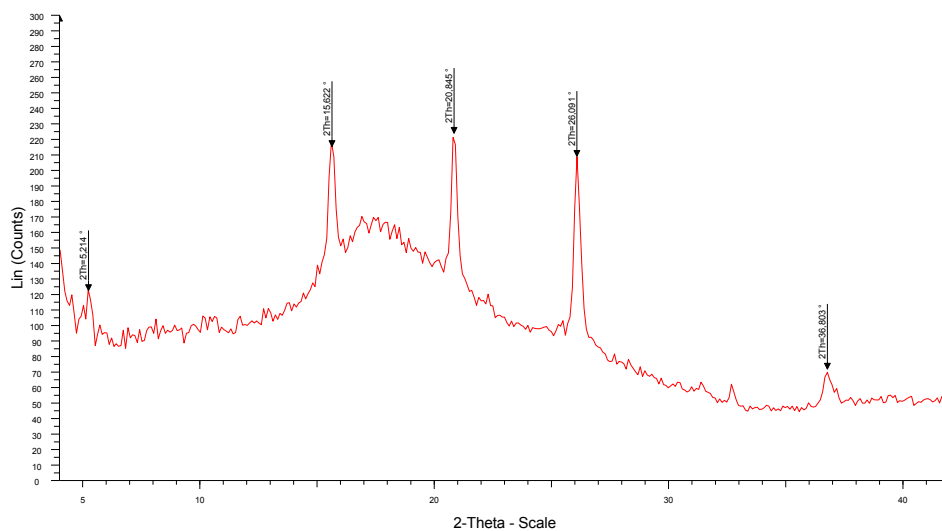

**Figure S3.** The X-ray diffraction pattern demonstrating the typical set of reflections for *001* oriented  $\alpha$ -(BEDT-TTF)<sub>2</sub>I<sub>3</sub> crystallites. [6]

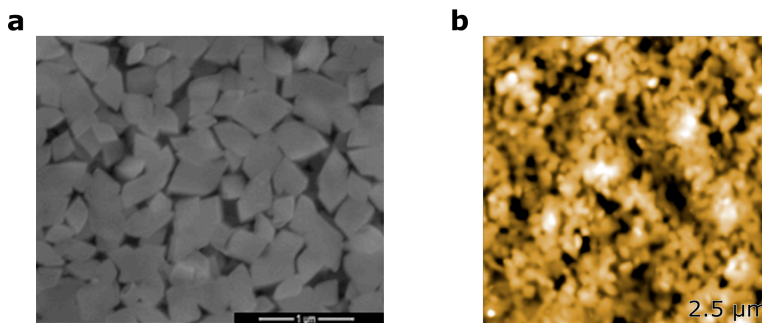

**Figure S4.** a) SEM image and b) AFM topography image of the conductive layer of the flexible highly piezo resistive bilayer film.



#### 4. Analytical Ultracentrifugation

Sedimentation velocity experiments were performed using a ProteomeLab XLI Protein Characterization System analytical ultracentrifuge (Beckman Coulter, Brea, CA) equipped with conventional double-sector Epon centerpieces with an optical path length of 12 mm and a four-hole rotor (AN-60Ti). The rotor speed was 42000 rpm. Cells were filled with 420  $\mu\text{L}$  of a sample solution and 440  $\mu\text{L}$  of solvent (0.2 M NaCl in water). Before a run, the rotor was equilibrated for approximately 1 h at 25°C in the centrifuge. Sedimentation profiles were obtained at the same temperature using interference optics. For the analysis of the sedimentation velocity data, the  $c(s)$  model with a Tikhonov–Phillips regularization procedure implemented into the Sedfit program was used.[7] The  $c(s)$  analysis involved the numerical solution of the Lamm equation assuming the same frictional ratio ( $f/f_{sph}$ ) values for each sedimenting species.

Evaluated velocity sedimentation coefficients and frictional ratios were extrapolated to zero concentration using corresponding linear approximations:

$$s^{-1} = s_0^{-1}(1 + k_s c) \quad 1$$

$$f/f_{sph} = (f/f_{sph})_0(1 + k_f c) \quad 2$$

where  $s_0$  and  $(f/f_{sph})_0$  are extrapolated values of the sedimentation coefficient and frictional ratios correspondingly,  $k_s$  is the concentration sedimentation parameter (Gralen coefficient), and  $k_f$  is the concentration frictional ratio parameter. The corresponding concentration dependences of the sedimentation coefficients and frictional ratios are presented in Figures S5 and S6, respectively.

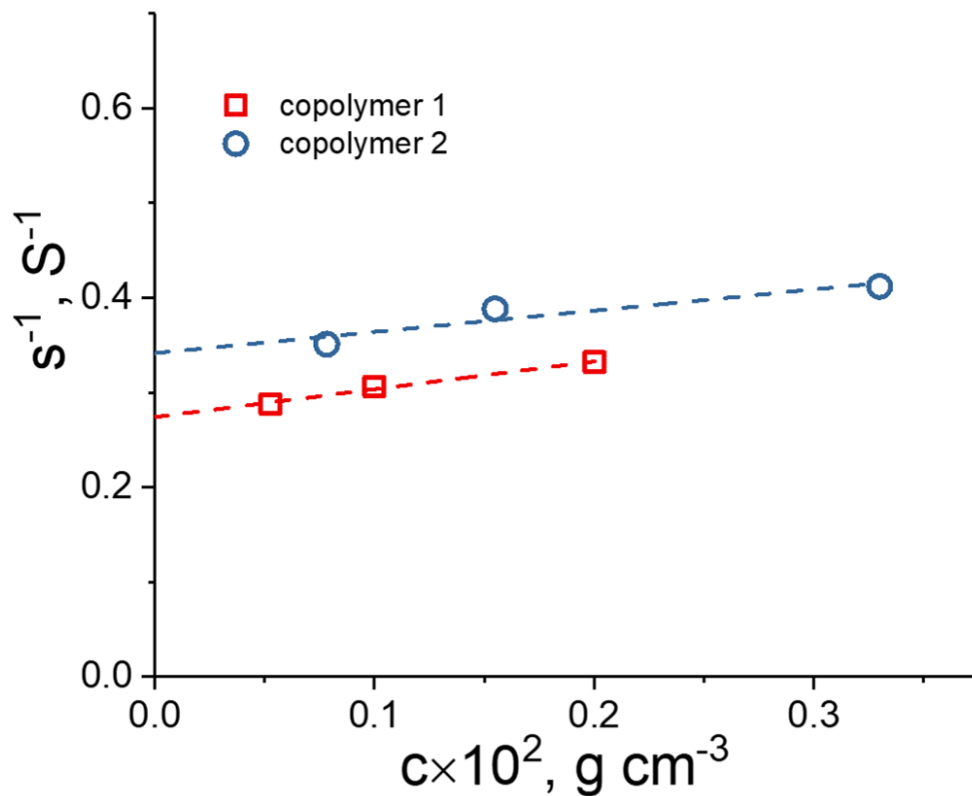

**Figure S5.** Concentration dependence of the reciprocal sedimentation coefficients for copolymers **1** and **2** in water 0.2 M NaCl solutions,  $T = 25^\circ\text{C}$ .

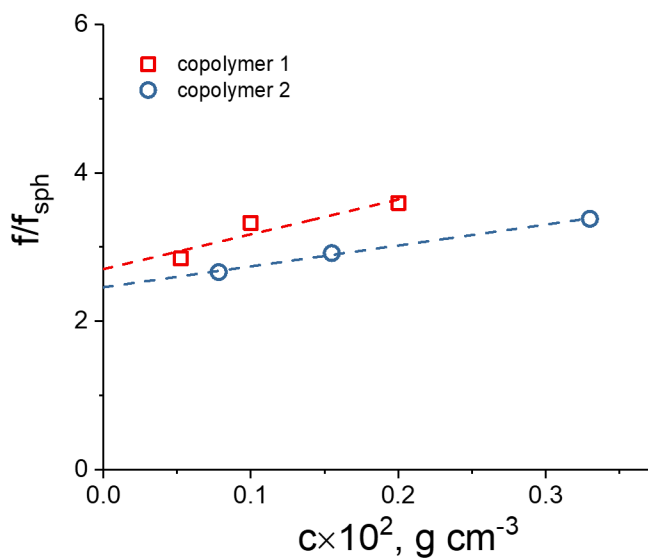

**Figure S6.** Concentration dependence of the frictional ratios for copolymers **1** and **2** in water 0.2 M NaCl solutions,  $T = 25^\circ\text{C}$ .

## 5. AFM images of thin films of copolymer 1

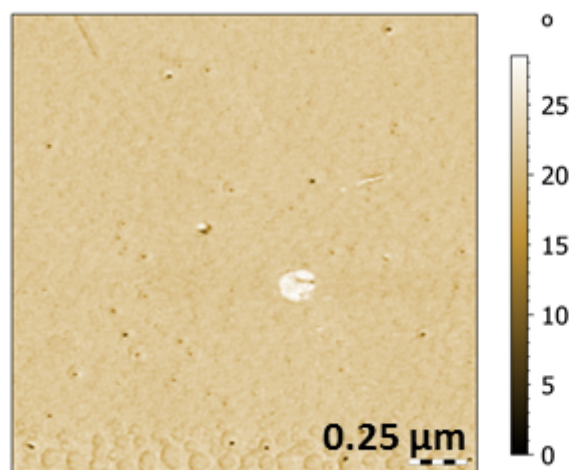

**Figure S7.** Bimodal phase image of the nanocavities of the self-assembled film of copolymer **1**.

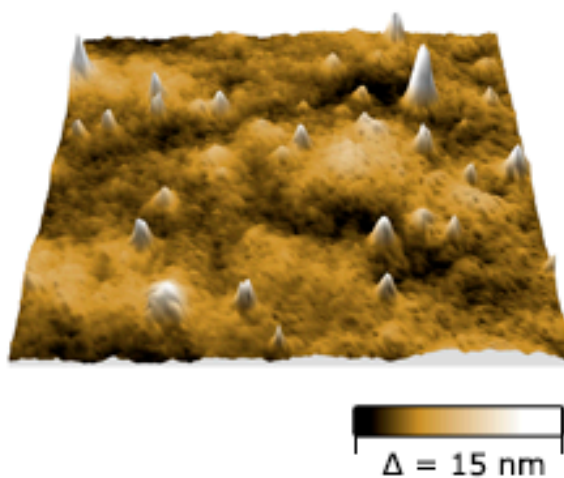

**Figure S8.** 3D representation of the AFM topography of myoglobin-filled nanocavities of the self-assembled film of copolymer **1**.

## 6. "PS-LDPE-12M" dummy sample

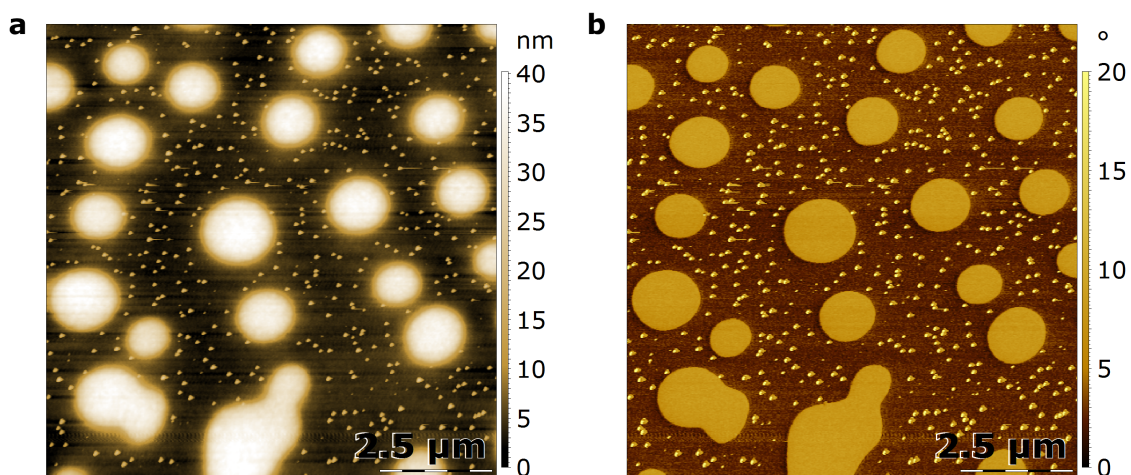

**Figure S9.** a) Topography and b) bimodal phase AFM images of the blend sample "PS-LDPE-12M" consisting of polystyrene with an elastic modulus of 2 GPa (bright areas) and polyolefin elastomer with an elastic modulus of 0.1 GPa (dark areas).

## 7. Scheme of myoglobin trapping

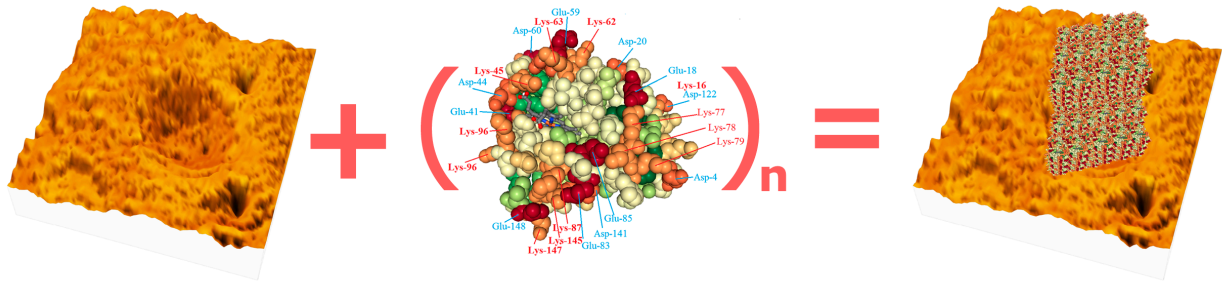

**Figure S10.** Scheme of myoglobin trapping by one cavity, where an “n” number of myoglobin molecules form protrusions consisting of crystalline-like myoglobin-based aggregates. In the figure, the “blue” and “red” colors of myoglobin represent negatively and positively charged groups, respectively.

**8. AFM topography images of negatively and slightly positively charged biomolecules on thin films of copolymer 2**

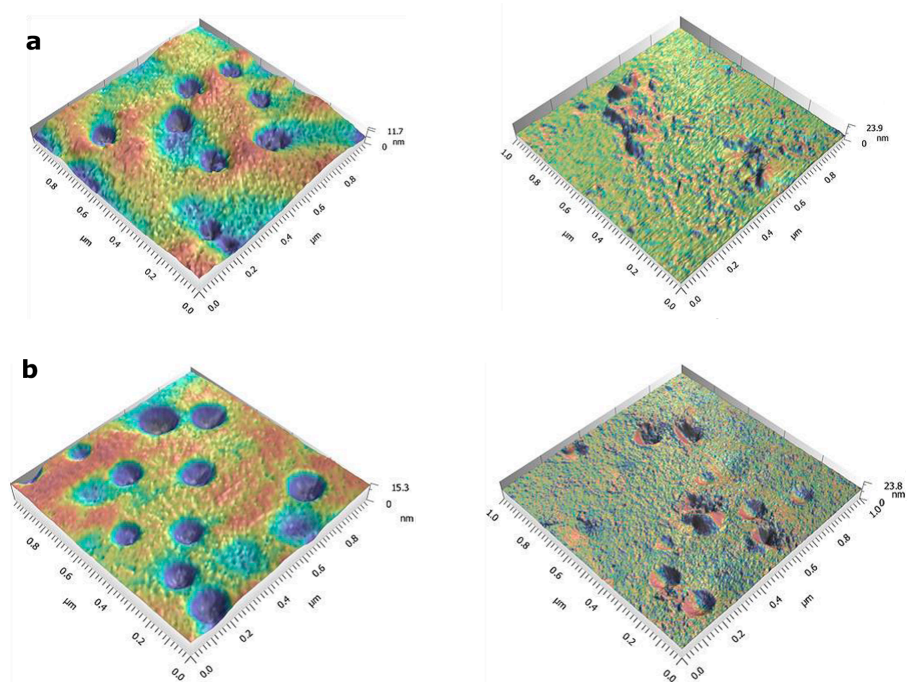

**Figure S11.** AFM topography images showing the surface change of a thin film of copolymer **2** after adding a) a negatively charged circular DNA (pBR322) solution and b) a water solution of myoglobin (pH ≈ 7).

## 9. References

- (1) Kratky, O.; Leopold, H.; Stabinger, H. *Methods Enzymol.* **1973**, *27*, 98-110.
- (2) Haschemeyer, R.H.; Haschemeyer, A.E.V. *Proteins. A Guide to Study by Physical and Chemical Methods*. John Wiley & Sons Inc.: Michigan (USA), **1973**.
- (3) Dalai, B.; Dash, S.; Singh, S.K. *Indian J. Pure Appl. Phys.* **2014**, *52*, 24-29.
- (4) Thurlkill, R.L.; Grimsley, G.R.; Scholtz, J.M.; Pace, C.N. *Protein Sci.* **2006**, *15*, 1214-1218.
- (5) Grimsley, G.R.; Scholtz, J.M.; Pace, C.N. *Protein Sci.* **2009**, *18*, 247-251.
- (6) Lebedev, V.; Laukhina, E.; Laukhin, V.; Rovira, C.; Veciana, J. *Eur. J. Inorg. Chem.* **2014**, 3927-3932.
- (7) Schuck, P. *Biophys. J.* **2000**, *78*, 1606-1619.
